# Supplementary material
Source: publisher figshare collection journal article supplement (https://karger.figshare.com/ndownloader/files/39600373)
Supplement: Supplementary file 1 [file 39600373]

## Sheet: Tabelle1
Study+K4A1:AP1	Name	Type	Content	First_in	Last_out	Duration days	Arms	Active 1	Active 2	Control	Controltype	n total	n1	n2	nC	WHO5 Outcome 1 m pre	WHO5 Outcome1 SD pre	WHO5 Outcome 1 M post	WHO5 Outcome 1 SD post	WHO5 Outcome 2 M pre	WHO5 Outcome 2 SD pre	WHO5 Outcome 2 M post	WHO5 Outcome 2 SD post	WHO5 Outcome3 M pre	WHO5 Outcome 3 SD pre	WHO5 Outcome 3 M post	WHO5 Outcome 3 SD post	mymop Outcome1 M pre	mymop Outcome1 SD pre	mymop Outcome1 M post	mymop Outcome1 SD post	mymop Outcome2 M pre	mymop Outcome2 SD pre	mymop Outcome 2 M post	mymop Outcome 2 SD post	mymop Outcome3 M pre	mymop Outcome3 SD pre	mymop Outcome 3 M post	mymop Outcome 3 SD post	Coherence Outcome1 M pre	Coherence Outcome1 SD pre	Coherence Outcome1 M post	Coherence Outcome1 SD post	Coherence Outcome2 M pre	Coherence Outcome2 SD pre	Coherence Outcome 2 M post	Coherence Outcome 2 SD post	Coherence Outcome3 M pre	Coherence Outcome3 SD pre
1	Coil	randomized	Coil vs Healy vs waiting	2021-03-29	2021-05-06	14	3	Coil	Healy	Waiting	No treatment	257	77	88	92	12.31	6.14	16.08	4.39	12.39	7.5	16.34	6.57	12.06	7.67	10.38	5.75	19.29	5.9	16.33	4.21	18.4	7.37	14.6	3.69	20.6	5.56	19.43	5.56	33.45	10.25	42.02	10.25	32.84	8.54	42.04	8.54	32.45	6.71
2	Coherence	non-randomized	Coherence vs waiting	2021-03-06	2021-05-20	14	2	Coherence		Waiting	No treatment	3438	3145		293	13.21	4.61	15.11	4.95					12.78	4.37	9.63	7.3	20.5	5.2	15.81	4.95					20.03	5.36	17.8	6.7	34.55	7.68	40.37	8.09					34.08	7.68
3	Resonance	randomized	Resonance vs. Healy vs. Waiting	2021-06-02	2021-07-19	14	3	Resonance	Healy	Waiting	No treatment	283	85	102	96	12.35	4.30312	16.09	4.3606	12.87	4.6002	15.85	3.99603	14.97	4.42589	12.03	4.61452	20.6235	4.48536	13.8471	5.90501	20.9406	5.09475	14.6238	6.58764	20.3871	4.4061	18.1935	5.99866
4	Coaching*	randomized	Personal Coach + vibration vs Personal Coach without vibration vs waiting	2021-07-06	2021-08-18	14	3	PC + vibration	PC without vibration	Waiting	No treatment	179	35	56	88	8.94286	4.06522	15.8286	4.01824	9.53571	3.91252	14.8036	4.54641	11.2727	3.3758	15.6705	4.25271	18.4571	6.54101	15.8	6.49344	17.4107	6.60241	15.0893	6.97079	18.0227	6.45048	16.2727	7.16269	30.7143	9.63624	39.6	7.24041	32.2857	8.00617	37.5893	7.90576	35.6222	7.94991
5	Wellbeing	nonrandomized	Different intensity of usage	2021-08-21	2022-01-28	14	6 reduced to 3	More than 30	Less than 30	no usage	No treatment	4230	3385	790	55	11.8206	4.46505	15.2534	4.79854	12.2431	4.65515	14.2678	4.88865	12.14	5.09301	11.93	5.51044	7.57	1.85	5.15	2.6	7.29288	1.98259	5.33067	2.40308	7.05	1.7	5.11	3.22
6	HRV watch	randomized	HRV dependent program vs. HRV +normal Healy vs. Only HRV measurement	2021-09-06	2021-10-01	14	3	HRV+adapted program	HRV+Healy	Only HRV not treatment	No treatment	105	29	36	40	12.7586	5.04023	15.6207	4.56238	11.8611	5.36205	13.4444	5.31545	12.2	4.36889	12.35	4.92794	21.2414	6.55556	16.5862	7.35584	20.6857	4.16407	15.7222	6.38127	21	4.48975	17.125	7.11512	18.8276	6.00636	14.2414	5.79812	18.8889	4.98442	15.3056	5.96092	18.35	5.08164
7	Power of 3	randomized	P3 vs Normal unvac	2021-12-14	2022-02-09	21	2	Power of 3		Normal program	TAU	377	175		202	8.27	4.45833	14.51	4.76562					8.74	3.85417	13.69	4.5	8.31	1.45833	4.41	2.29688					8.23	1.29688	5.3	2.32812	22.65	5.54688	12.84	5.41146					22.81	5.27083
		randomized	P3 vs Normal vacc	2021-12-14	2022-02-09	21	2	Power of 3		Normal program	TAU	216	99		117	8.25	4.39583	15.53	5.04167					8.49	5.11979	12.84	5.67708	8.05	1.57812	4.42	2.60417					7.75	1.86979	5.18	2.80729	23.24	6	12.97	5.86458					22.13	6.875
8	Soul Cycle	randomized	Soul Cycle & Mental Balance vs. Normal	2022-01-24	2022-02-27	14	3	Soul cycle	Mental balance	Normal program	TAU	391	108	122	161	9.64	4.37	16.14	4.27	9.66	4.21	15.16	4.92	10.65	4.54	14.21	4.91	7.68	1.91	4.36	2.37	7.77	1.62	4.59	2.41	7.45	1.59	5.07	1.96	20.93	6.3	11.84	6.0127	20.54	6	12.95	6.3	19.47	6.01
*	Mymop=Goal attainment: Anstieg positiv
	recoded: Pre => Post and vice versa
[truncated: 2 more columns]
